# Supplementary material for: Usefulness of S100β protein in patients on antithrombotic drugs with mild traumatic brain injury: a prospective cohort study in an emergency department
Source: Research Square preprint supplement (doi:10.21203/rs.3.rs-6940155/v1), 2025-09-24
Supplement: Supplementary file 1 [file 32fea782495306d6e845a2b4.docx]

**APPENDIX**

***Inclusion form***

Date: ....../....../.......

PATIENT LABEL

Inclusion physician: .......................................

| ***Information given and non-opposition*** | YES | If NO = information sheet to be given  If opposition = **STOP** |
| --- | --- | --- |
| ***No non-inclusion criteria*** | CCT > 6h yes no  GCS ≤ 12 yes no  Polytrauma yes no  Minor yes no  Pregnant woman yes no  Subjects under legal protection  yes no  History of skin or brain tumours  yes no | ABSENCE |
| PRESENCE = **STOP** |
| ***Type of antithrombotics*** | Antiplatelet agents  yes no | Acetylsalicylic acid (Kardegic®)  Clopidogrel (Plavix®)  Prasugrel (Efient®)  Ticagrelor (Brilique®) |
| Heparins & related products  yes no | LMWH / UFH  Fondaparinux (Arixtra®)  Danaparoid (Orgaran®) |
| Anti-vitamin K  yes no | Warfarin (Coumadine®)  Fluindione (Previscan®)  Acenocoumarol (Sintrom®) |
| Direct oral anticoagulants  yes no | Rivaroxaban (Xarelto®)  Apixaban (Eliquis®)  Dabigatran (Pradaxa®) |
| ***Onset of TBI*** | Time: .....h.....  ***or*** estimated maximum delay: ….. | Mechanism:  - Fall from height  - Road accidents  - Aggression  - Sports activity  - Other specify: ...........................  - Unknown |
| ***GCS at the exam*** | ...../15 | E ...../4 V ...../5 M ...../6 |
| ***Associate*** | Loss of consciousness yes no  Post-traumatic vomiting ≥ 2 episodes yes no  Post-traumatic convulsions yes no  Post-traumatic focal neurological deficit yes no  Severe post-traumatic headache yes no  Retrograde amnesia > 30min yes no  Suspected skull fracture yes no  Acute alcohol or drug intoxication yes no | |
