# Supplementary material for: Usefulness of S100β protein in patients on antithrombotic drugs with mild traumatic brain injury: a prospective cohort study in an emergency department
Source: Research Square preprint supplement (doi:10.21203/rs.3.rs-6940155/v1), 2025-09-24
Supplement: Supplementary file 2 [file 8406b63a360277f98634e726.docx]

**Table 1.** Demographic and clinical characteristics of the study population according to the CCT’s result

|  | **Total**  **n=245** | **Normal CCT**  **n=230 (93.9%)** | **Injured CCT**  **n = 15 (6.1%)** | ***p*** |
| --- | --- | --- | --- | --- |
| **Mean age (years)** | 81.5 ± 11.8 | 81.4 ± 11.9 | 82.1 ± 10.2 | *0.825* |
| **Gender, n (%) Men** | 123 (50.2%) | 114 (49.6%) | 9 (60%) | *0.433* |
| **Mechanism of the trauma, n (%)** |  |  |  |  |
| *Fall* | 225 (91.8%) | 212 (92.2%) | 13 (86.7%) |  |
| *Road Accident* | 11 (4.5%) | 10 (4.3%) | 1 (6.7%) |  |
| *Assault* | 3 (1.2%) | 3 (1.3%) | 0 (0%) |  |
| *Sport* | 4 (1.6%) | 3 (1.3%) | 1 (6.7%) |  |
| *Other* | 2 (0.8%) | 2 (0.9%) | 0 (0%) |  |
| **Antithrombotic drugs, n (%)** |  |  |  | *0.433* |
| Antiplatelet agent | 151 (61.6%) | 141 (61.3%) | 10 (66.7%) |  |
| *Aspirin* | 132 (53.8%) | 122 (53%) | 10 (66.7%) |  |
| *Clopidogrel* | 19 (7.8%) | 19 (8.3%) | 0 (0%) |  |
| Heparins | 4 (1.6%) | 4 (1.7%) | 0 (0%) |  |
| Vitamin-K antagonists | 28 (11.4%) | 27 (11.7%) | 1 (6.7%) |  |
| *Warfarin* | 13 (5.3%) | 12 (5.2%) | 1 (6.7%) |  |
| *Fluindione* | 14 (5.7%) | 14 (6.1%) | 0 (0%) |  |
| *Acenocoumarol* | 1 (0.4%) | 1 (0.4%) | 0 (0%) |  |
| Direct oral anticoagulants | 57 (23.3%) | 53 (23.0%) | 4 (26.7%) |  |
| *Rivaroxaban* | 19 (7.8%) | 16 (7.0%) | 3 (20%) |  |
| *Apixaban* | 36 (14.7%) | 35 (15.2%) | 1 (6.7%) |  |
| *Dabigatran* | 2 (0.8%) | 2 (0.8%) | 0 (0%) |  |
| Antithrombotic association | 5 (2.0%) | 5 (2.1%) | 0 (0%) |  |
| *Aspirin + Clopidogrel* | 3 (1.2%) | 3 (1.3%) | 0 (0%) |  |
| *Aspirin + Apixaban* | 1 (0.4%) | 1 (0.4%) | 0 (0%) |  |
| *Aspirin + Fluindione* | 1 (0.4%) | 1 (0.4%) | 0 (0%) |  |
| **GCS, n (%)** |  |  |  | ***0.007*** |
| *15* | 222 (90.6%) | 212 (92.2%) | 10 (66.7%) |  |
| *14 or 13* | 23 (9.4%) | 18 (7.8%) | 5 (33.3%) |  |
| **Symptoms, n (%)** |  |  |  |  |
| *Loss of consciousness* | 23 (9.4%) | 21 (9.1%) | 2 (13.3%) | *0.639* |
| *Headache* | 0 (0%) | 0 (0%) | 0 (0%) | *-* |
| *Vomits > 2 times* | 6 (2.4%) | 6 (2.6%) | 0 (0%) | *0.523* |
| *Amnesia > 30 min* | 7 (2.9%) | 7 (3.0%) | 0 (0%) | *0.493* |
| *Suspected skull fracture* | 5 (2.0%) | 4 (1.7%) | 1 (6.7%) | *0.272* |
| *Focal neurologic deficit* | 2 (0.8%) | 2 (0.8%) | 0 (0%) | *1.000* |
| *Convulsions* | 1 (0.4%) | 1 (0.4%) | 0 (0%) | *1.000* |
| **Intoxication (alcohol or narcotics), n (%)** | 22 (9.0%) | 21 (9.1%) | 1 (6.7%) | *0.746* |
| **Time between mTBI and S100β assay (minutes)** | 176.8 ± 64.1 | 168.6 ± 75.9 | 177.3 ± 63,2 | *0.536* |
| *< 180 min, n (%)* | 139 (56.7%) | 129 (56.1%) | 10 (66.7%) |  |
| *180-360 min, n (%)* | 106 (43.3%) | 101 (43.9%) | 5 (33.3%) |  |
| **S100β levels (µg/L), mean ± SD** | 0.322 ± 0.460 | 0.319 ± 0.466 | 0.379 ± 0.288 | *0.620* |
| *Normal, n (%)* | 58 (23.7%) | 58 (25.2%) | 0 (0%) | ***0.025*** |
| *CCT: cerebral computed tomography; GCS: Glasgow coma scale; mTBI: mild traumatic brain injury; ED: Emergency department;*  *SD: Standard deviation.* | | | | |
