# Supplementary material for: Usefulness of S100β protein in patients on antithrombotic drugs with mild traumatic brain injury: a prospective cohort study in an emergency department
Source: Research Square preprint supplement (doi:10.21203/rs.3.rs-6940155/v1), 2025-09-24
Supplement: Supplementary file 3 [file a2b9e33dfdcffc7935e95326.docx]

**Table 2.** Diagnostic performance of the S100β according to laboratory reference threshold

|  | ***Population***  ***n=245*** | ***H0H3 Subgroup***  ***n=139*** | ***H3H6 Subgroup***  ***n=106*** |
| --- | --- | --- | --- |
| ***Sensitivity*** | 100% [78.2% - 100%] | 100% [66.4% - 100%] | 100% [54.1% - 100%] |
| ***Specificity*** | 25.2% [19.7% - 31.3%] | 18.5% [12.2% - 26.2%] | 34.0% [24.8% - 44.1%] |
| ***NPV*** | 100% [93.8% - 100%] | 100% [85.7% - 100%] | 100% [89.7% - 100%] |
| ***PPV*** | 8.0% [7.5% - 8.6%] | 7.9% [7.3% - 8.5%] | 8.3% [7.4% - 9.5%] |
| ***LR+*** | 1.34 [1.24 - 1.44] | 1.23 [1.13 - 1.33] | 1.52 [1.32 - 1.74] |
| ***LR-*** | 0 | 0 | 0 |
| ***Avoidable CCT (%)*** | 23.7% | 17.3% | 32.1% |
| *NPV: negative predictive value; PPV: positive predictive value; LR+: positive likelihood ; LR-: negative likelihood ; CCT: cerebral computerized tomography;*  *Laboratory threshold 0.105µg/L; Avoidable CCT: rate of true negative results, calculated from the contingency table* | | | |
