# Supplementary material for: Usefulness of S100β protein in patients on antithrombotic drugs with mild traumatic brain injury: a prospective cohort study in an emergency department
Source: Research Square preprint supplement (doi:10.21203/rs.3.rs-6940155/v1), 2025-09-24
Supplement: Supplementary file 4 [file f88f11aaf48f20104bf8ab5c.docx]

**Table 3.** Estimated costs (€) of diagnostic strategies for mTBI patients under ATD, with and without S100β assay.

|  | **CCT**  *102.61 €/test (€)* | **S100β**  *32.40 €/test (€)* | **EDSSU**  *380.21 €/patient/day (€)* | **Total cohort**  *(€)* | **Cost/patient**  *(€)* |
| --- | --- | --- | --- | --- | --- |
| **Current strategy** | 25 139.45 | 0 | 93 151.45 | 118 290.90 | 482.82 |
| **S100β ± CCT strategy**  *Threshold > 0.105 µg/L*  Avoidable CCT *23.7%* | 19 181.40 | 7 938.00 | 71 074.56 | 98 193.96 | 400.79 |
| **Difference** |  |  |  | 20 096.94 | 82.03 |
| *CCT: cerebral computerized tomography; EDSSU: Emergency department short stay unit;*  *Laboratory threshold 0.105µg/L; Avoidable CCT: rate of true negative results, calculated from the contingency table* | | | | | |
